# Supplementary material for: Exceptional thermal stability of industrially-important enzymes by entrapment within nano-boehmite derived alumina
Source: Royal Society of Chemistry journal article supplement (doi:10.1039/c4ra10944a), 2015-01-01
Supplement: c4ra10944a1.pdf [file c4ra10944a1.pdf]

## Exceptional thermal stability of industrially-important enzymes by entrapment within nano-boehmite derived alumina

Vladimir V. Vinogradov<sup>a,b</sup> and David Avnir<sup>\*a</sup>

<sup>a</sup> Institute of Chemistry and the Center for Nanoscience and Nanotechnology, the Hebrew University of Jerusalem, Jerusalem 91904, Israel. E-mail: david.avnir@mail.huji.ac.il

<sup>b</sup> Laboratory of Solution Chemistry of Advanced Materials and Technologies, ITMO University, St. Petersburg, 197101, Russian Federation.

E-mail: vinogradoffs@mail.ru

### Electronic Supplementary Information

#### Additional HR-SEM images of synthesized materials

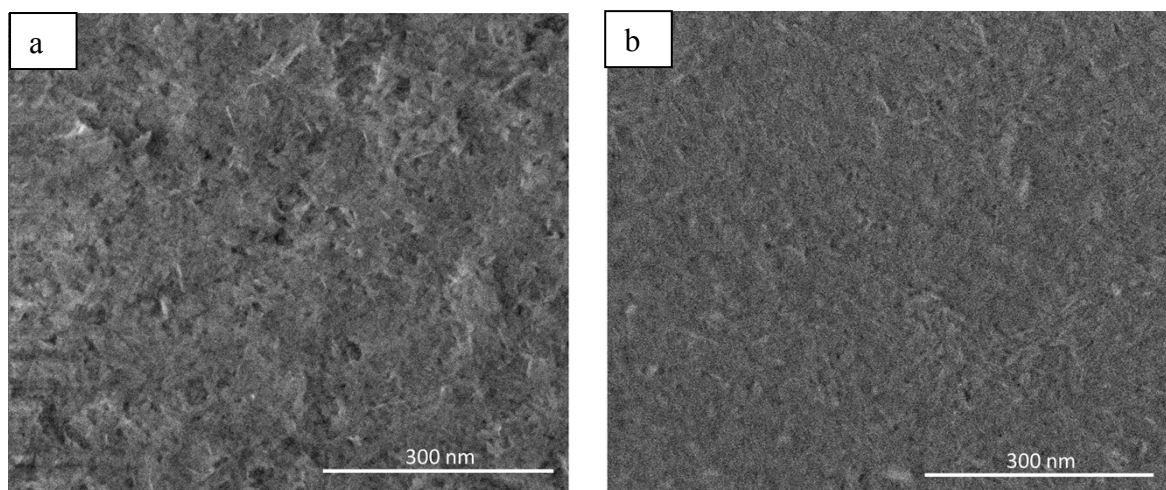

Figure 1S. HR-SEM images of the alumina (a) and of XY@alumina (b).

#### XRD data of the synthesized materials

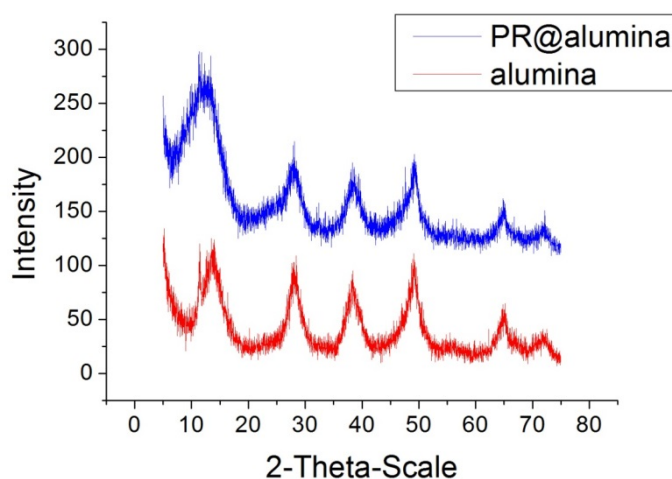

Figure 2S. XRD patterns of synthesized alumina and of PR@alumina. The typical boehmite structure is seen both for pure alumina and for PR@alumina.

*TGA of alumina and of XY@alumina*

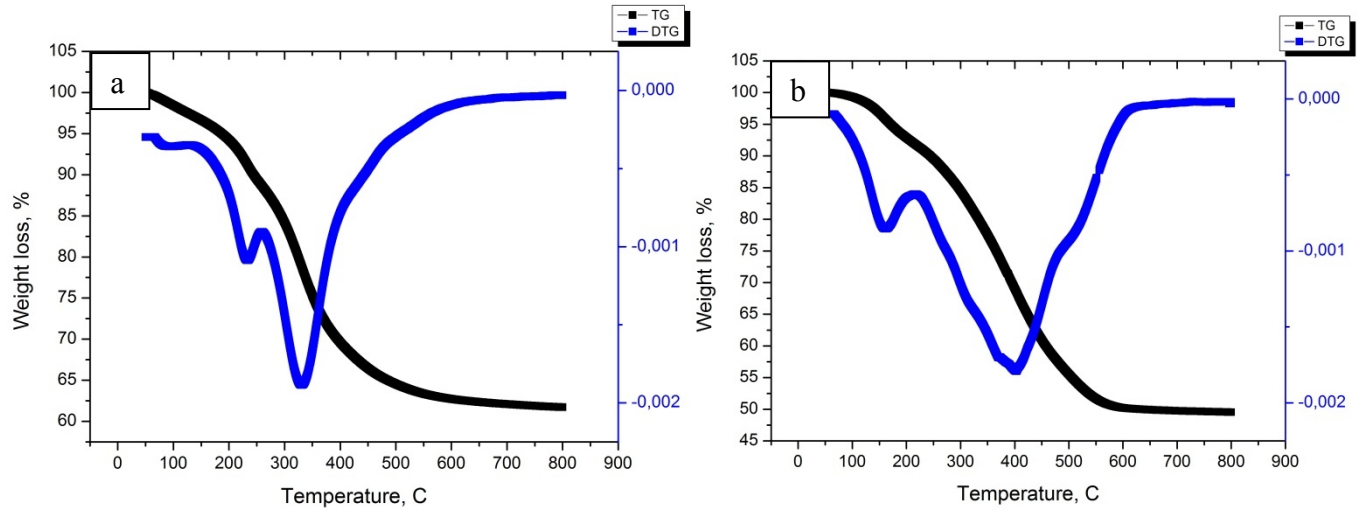

**Figure 3S.** Thermal gravimetric analysis of alumina (a) and of XY@alumina (b). In the temperature range up to 200 °C physically related water evaporates. Chemical decomposition of boehmite matrix to gamma-alumina starts from 200 degrees with maximum at 330°C. Note that the entrapment of XY shifts that temperature to 400°C.
